# Supplementary material
Source: Springer Nature journal article supplement (https://www.springermedizin.de/resource/supplementary/12931_2013_1414_MOESM8_ESM.pdf/9425950)

**A**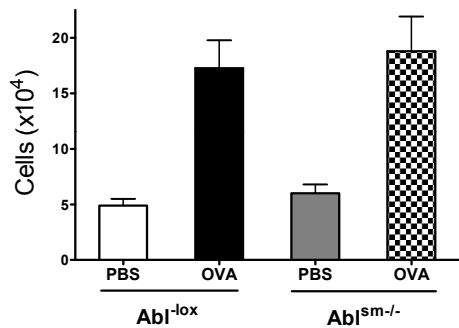**B**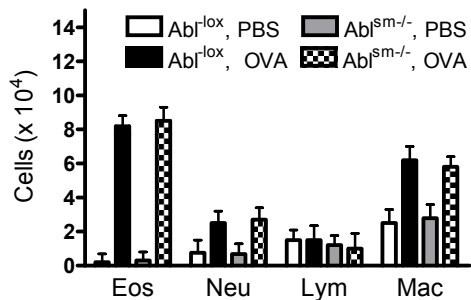**C**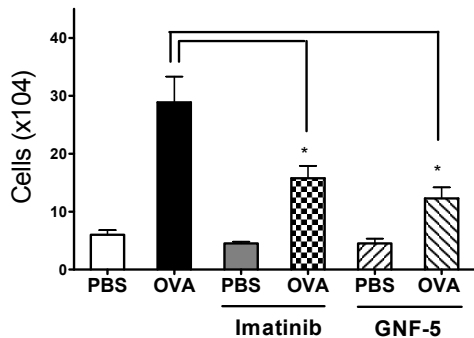**D**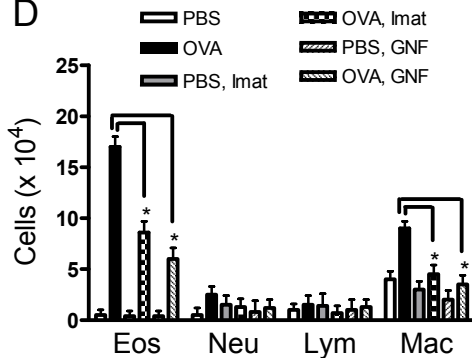

Supplement: MOESM8 [file 9425950]
